# Supplementary material for: K5Yb1−xEux(MoO4)4 phosphors: aperiodic structures and luminescence properties
Source: Royal Society of Chemistry journal article supplement (doi:10.1039/d3ce00401e), 2023-01-01
Supplement: d3ce00401e1.pdf [file d3ce00401e1.pdf]

## Supplementary Information

### **$K_5Yb_{1-x}Eu_x(MoO_4)_4$ phosphors: aperiodic structures and luminescence properties.**

Svetlana M. Posokhova,<sup>\*,1</sup> Vladimir A. Morozov,<sup>1</sup> Egor M. Zonov,<sup>1</sup> Dina V. Deyneko,<sup>1</sup>  
Dmitry A. Spassky,<sup>2,3</sup> Fedor D. Fedyunin,<sup>4</sup> Alexei A. Belik,<sup>5</sup> Erzhen T. Pavlova,<sup>6</sup>  
Andrey A. Vasin,<sup>7</sup> Bogdan I. Lazoryak<sup>1</sup>

<sup>1</sup> *Chemistry Department, Moscow State University, 119991, Moscow, Russia.*

<sup>2</sup> *Skobeltsyn Institute of Nuclear Physics, Moscow State University, 119991, Moscow, Russia*

<sup>3</sup> *Institute of Physics, University of Tartu, W. Ostwald str. 1, 50411 Tartu, Estonia*

<sup>4</sup> *Physics Department, Moscow State University, Leninskiye Gory 1-2, 11991 Moscow, Russia*

<sup>5</sup> *International Center for Materials Nanoarchitectonics (WPI-MANA), National Institute for Materials Science, Namiki 1-1, Tsukuba, Ibaraki 305-0044, Japan*

<sup>6</sup> *Buryat State University, Smolin St. 24a, Ulan-Ude, 670000 Buryat Republic, Russia*

<sup>7</sup> *Institute of Solid State Chemistry, Ural Branch, Russian Academy of Sciences, Ekaterinburg 620990, Russia*

**\*Corresponding author: Svetlana M. Posokhova**

Tel.: +74959392138

E-mail: posohovasm@gmail.ru

Chemistry Department, Lomonosov Moscow State University,  
119991, Moscow, Russia

Table S1. Element analysis results of  $\alpha$ -K<sub>5</sub>Yb<sub>1-x</sub>Eu<sub>x</sub>(MoO<sub>4</sub>)<sub>4</sub> (0 ≤ x ≤ 1).

| <i>x</i> | K, at.%    | Mo, at.%   | Yb, at.%   | Eu, at.%   | Yb:Eu ratio | Method  |
|----------|------------|------------|------------|------------|-------------|---------|
| 0.1      | 47.80±0.18 | 41.50±0.40 | 9.71±0.53  | 0.99±0.07  | 0.91:0.09   | SEM-EDX |
| 0.3      |            |            |            |            | 0.73:0.27   | ICP-MS  |
| 0.4      | 48.60±0.37 | 41.55±0.26 | 6.12±0.40  | 3.73±0.10  | 0.62:0.38   | SEM-EDX |
|          |            |            | 60.05±1.27 | 39.95±1.27 | 0.60:0.40   | TEM-EDX |
| 0.5      | 48.33±0.18 | 41.76±0.16 | 5.39±0.20  | 4.53±0.14  | 0.54:0.46   | SEM-EDX |
| 0.7      |            |            |            |            | 0.33:0.67   | ICP-MS  |
| 0.9      | 48.97±0.18 | 41.53±0.10 | 1.36±0.05  | 8.14±0.07  | 0.14:0.86   | SEM-EDX |

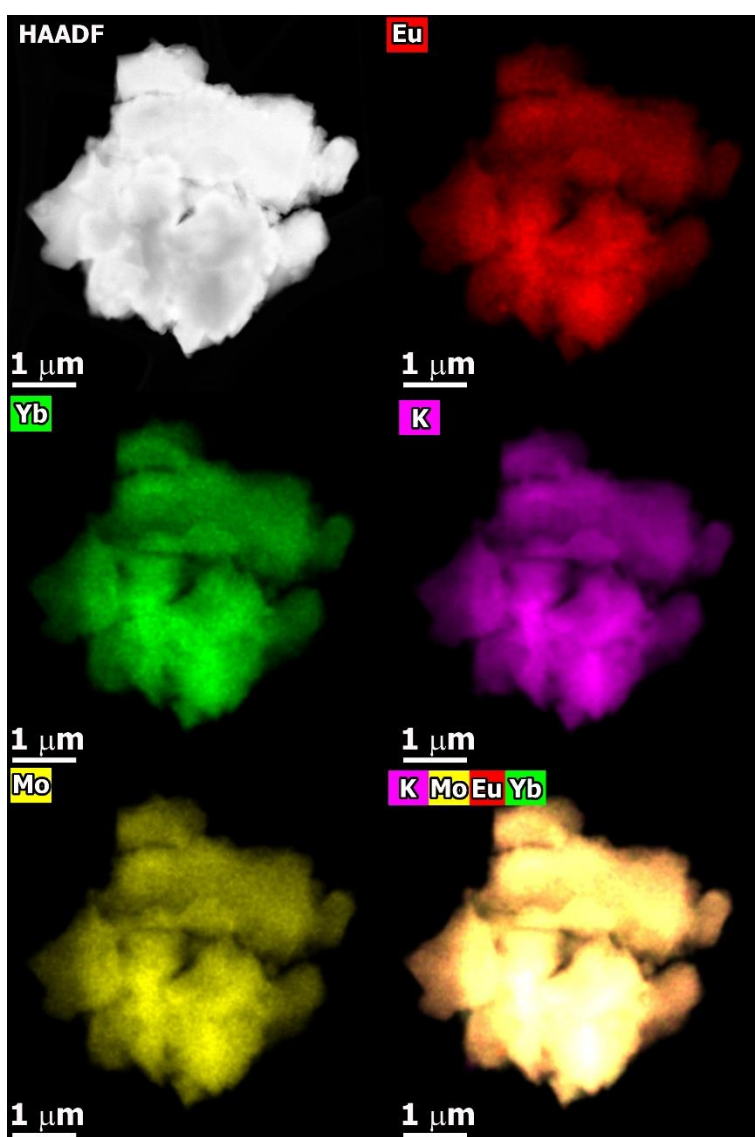

Figure S1. HAADF-STEM images of the particles in the K<sub>5</sub>Yb<sub>0.6</sub>Eu<sub>0.4</sub>(MoO<sub>4</sub>)<sub>4</sub> sample along with the corresponding color-coded elemental maps and the mixed EDX map for K, Mo, Yb, Eu.

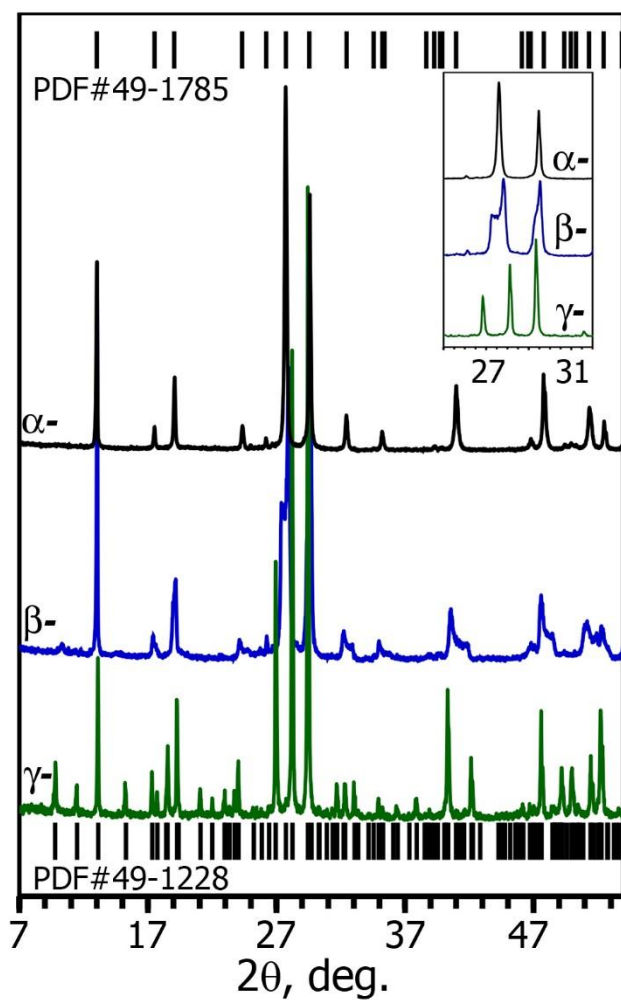

Figure S2. Parts of PXRD patterns for  $\gamma$ -,  $\beta$ - and  $\alpha$ -modification of  $K_5Yb(MoO_4)_4$ . The inset shows fragments in  $2\theta$  ranges of  $25$ - $32^\circ$ . Tick marks denote the peak positions of possible Bragg reflections for  $\gamma$ - (PDF#49-1228) and  $\alpha$ - $K_5Yb(MoO_4)_4$  (PDF#49-1785).

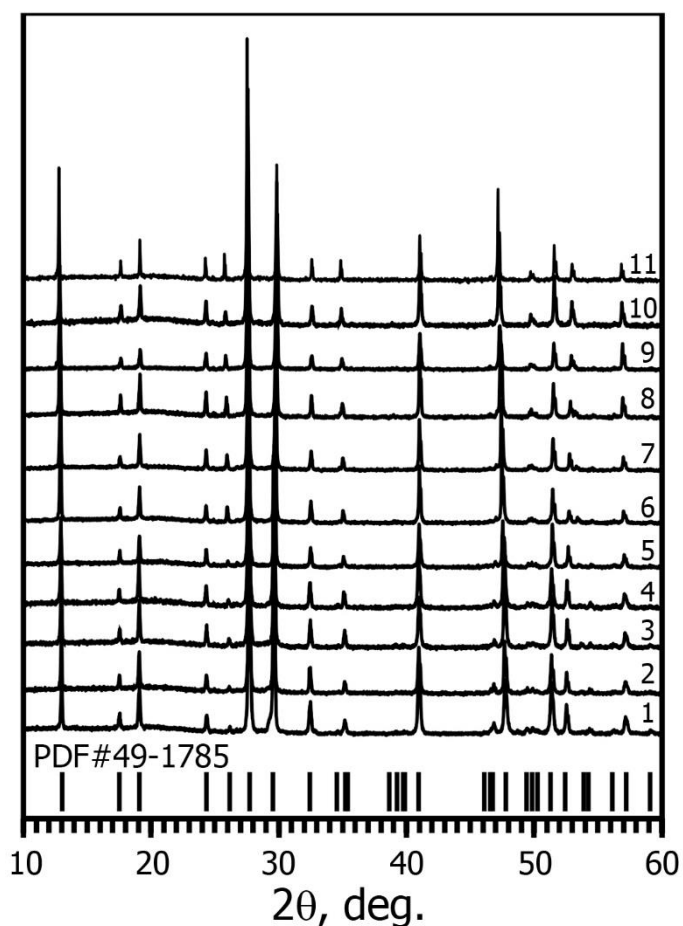

Figure S3. Parts of PXRD patterns for  $\alpha$ -K<sub>5</sub>Yb<sub>1-x</sub>Eu<sub>x</sub>(MoO<sub>4</sub>)<sub>4</sub> ( $x$ : 0(1)-1(11), step 0.1) annealing at 1123±10 K followed by quenching to the liquid nitrogen temperature. Tick marks denote the peak positions of possible Bragg reflections for  $\alpha$ -K<sub>5</sub>Yb(MoO<sub>4</sub>)<sub>4</sub> (PDF#49-1785).

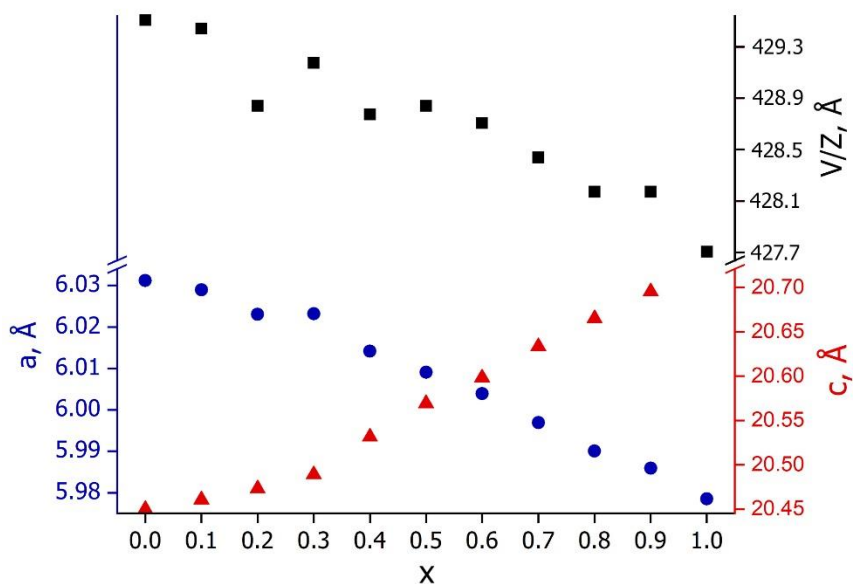

Figure S4. The lattice cell parameters of  $\alpha$ -K<sub>5</sub>Yb<sub>1-x</sub>Eu<sub>x</sub>(MoO<sub>4</sub>)<sub>4</sub> ( $x=0.1-1$ ).

Table S2. Unit cell parameters for  $\alpha\text{-K}_5\text{Yb}_{1-x}\text{Eu}_x(\text{MoO}_4)_4$  ( $0 \leq x \leq 1$ , SG  $R\bar{3}m$ ,  $Z=1.5$  ( $\alpha$ -phase)) annealed at  $1123 \pm 10$  K samples followed by quenching from the high to the liquid nitrogen temperature.

| $x$ | $a, \text{\AA}$ | $c, \text{\AA}$ | $V, \text{\AA}^3$ | $V/Z, \text{\AA}^3$ | <i>Ref.</i>     |
|-----|-----------------|-----------------|-------------------|---------------------|-----------------|
| 0   | 6.0372(1)       | 20.4045(2)      | 644.06(1)         | 429.37              | [14]            |
| 0   | 6.0312(2)       | 20.4499(8)      | 644.21(4)         | 429.47              |                 |
| 0.1 | 6.0290(2)       | 20.4606(7)      | 644.07(4)         | 429.38              |                 |
| 0.2 | 6.0231(1)       | 20.4731(4)      | 643.21(1)         | 428.81              |                 |
| 0.3 | 6.0232(1)       | 20.4890(5)      | 643.74(1)         | 429.16              |                 |
| 0.4 | 6.0142(2)       | 20.5316(7)      | 643.14(4)         | 428.76              |                 |
| 0.5 | 6.0090(1)       | 20.5692(6)      | 643.22(3)         | 428.81              |                 |
| 0.6 | 6.0039(1)       | 20.5983(5)      | 643.03(2)         | 428.69              |                 |
| 0.7 | 5.9969(1)       | 20.6335(5)      | 642.63(3)         | 428.42              |                 |
| 0.8 | 5.9901(2)       | 20.6654(7)      | 642.15(4)         | 428.10              |                 |
| 0.9 | 5.9859(2)       | 20.6954(8)      | 642.20(4)         | 428.13              |                 |
| 1   | 5.9785(1)       | 20.7253(5)      | 641.53(3)         | 427.69              |                 |
| 1   | 5.9785(1)       | 20.7254(5)      | 641.54(3)         | 427.69              | [12]            |
| 1   | 5.980           | 20.74           | 642.53            | 428.35              | PDF-2, №45–0340 |

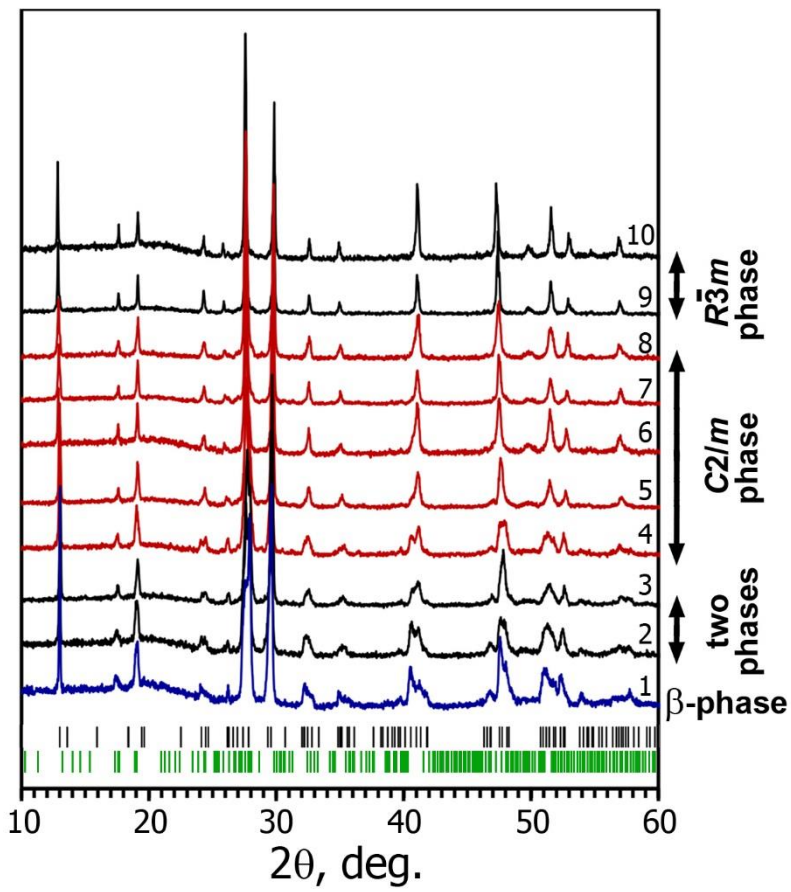

Figure S5. Parts of PXRD patterns for IM- $K_5Yb_{1-x}Eu_x(MoO_4)_4$  ( $x$ : 0(1)-0.9(10), step 0.1) annealing at  $1123 \pm 10$  K then slow cooling. Positions of main (black) and satellite (green) reflections for incommensurately modulated  $\beta$ - $K_5Yb(MoO_4)_4$  also are presented by bars.

Table S3. Unit cell parameters for LT-K<sub>5</sub>Yb<sub>1-x</sub>Eu<sub>x</sub>(MoO<sub>4</sub>)<sub>4</sub> (0 ≤ x ≤ 1) samples synthesized by a solid state reaction at 893 ± 10 K followed by slow cooling to T<sub>R</sub>.

| $x$ | $SG$        | $a, \text{Å}$ | $b, \text{Å}$ | $c, \text{Å}$ | $\beta$    | $V, \text{Å}^3$ | $Ref.$ |
|-----|-------------|---------------|---------------|---------------|------------|-----------------|--------|
| 0   | $C2/c$      | 14.8236(1)    | 12.1293(1)    | 10.5151(1)    | 114.559(1) | 1719.58(3)      | [14]   |
| 0   | $C2/c$      | 14.8550(1)    | 12.1449(4)    | 10.5270(3)    | 114.576(1) | 1727.17(4)      |        |
| 0.1 | $C2/c$      | 14.8777(9)    | 12.1309(3)    | 10.5141(2)    | 114.645(1) | 1724.73(5)      |        |
|     | $C2/m$      | 10.4950(2)    | 6.0504(1)     | 7.7753(6)     | 118.309(7) | 434.67(2)       |        |
| 0.2 | $C2/c$      | 14.9154(5)    | 12.0864(5)    | 10.5586(1)    | 115.021(4) | 1724.8(1)       |        |
|     | $C2/m$      | 10.6573(3)    | 6.0394(3)     | 7.8377(5)     | 119.455(9) | 439.30(6)       |        |
| 0.3 | $C2/m$      | 10.4554(8)    | 6.0303(4)     | 7.7138(4)     | 117.906(2) | 430.06(1)       |        |
| 0.4 | $C2/m$      | 10.4400(2)    | 6.0223(8)     | 7.7180(9)     | 117.610(1) | 430.00(1)       |        |
| 0.5 | $C2/m$      | 10.4312(6)    | 6.0154(1)     | 7.7257(3)     | 117.547(1) | 429.81(1)       |        |
| 0.6 | $C2/m$      | 10.4217(1)    | 6.0074(7)     | 7.7238(7)     | 117.335(1) | 429.50(9)       |        |
| 0.7 | $C2/m$      | 10.3985(4)    | 6.0014(4)     | 7.7173(2)     | 117.042(1) | 429.00(2)       |        |
| 0.8 | $R\bar{3}m$ | 5.9906(1)     |               | 20.6622(5)    |            | 642.15(1)       |        |
| 0.9 | $R\bar{3}m$ | 5.9918(1)     |               | 20.7176(8)    |            | 643.96(1)       |        |
| 1   | $R\bar{3}m$ | 5.9795(3)     |               | 20.7348(5)    |            | 642.00(1)       |        |
| 1   | $R\bar{3}m$ | 5.9780(2)     |               | 20.7257(7)    |            | 641.44(3)       | [12]   |

Table S4. Unit cell parameters for IM-K<sub>5</sub>Yb<sub>1-x</sub>Eu<sub>x</sub>(MoO<sub>4</sub>)<sub>4</sub> (0 ≤ x ≤ 1) samples synthesized by annealing at 1123 ± 10 K for 3 h in air followed by slow cooling to T<sub>R</sub>.

| $x$ | $SG$              | $a, \text{Å}$ | $b, \text{Å}$ | $c, \text{Å}$ | $\beta$    | $V, \text{Å}^3$ | $Ref.$ |
|-----|-------------------|---------------|---------------|---------------|------------|-----------------|--------|
| 0   | $X2/m(0\beta0)00$ | 10.405(2)     | 6.118(1)      | 19.775(2)     | 136.63(1)  | 864.2(3)        | [15]   |
| 0   | $X2/m(0\beta0)00$ | 10.428(2)     | 6.0819(4)     | 19.693(3)     | 136.292(5) | 863.0(2)        |        |
| 0.1 | $X2/m(0\beta0)00$ | 10.266(3)     | 6.0680(7)     | 19.558(3)     | 135.772(7) | 849.8(3)        |        |
|     | $C2/m$            | 10.456(1)     | 6.0246(7)     | 7.6820(7)     | 117.799(8) | 428.1(2)        |        |
| 0.2 | $X2/m(0\beta0)00$ | 10.106(1)     | 6.0554(4)     | 19.422(3)     | 135.339(5) | 835.4(2)        |        |
|     | $C2/m$            | 10.4191(9)    | 6.0202(6)     | 7.6453(5)     | 117.418(6) | 425.7(2)        |        |
| 0.3 | $C2/m$            | 10.444(1)     | 6.0252(7)     | 7.6866(8)     | 117.799(7) | 427.86(9)       |        |
| 0.4 | $C2/m$            | 10.419(1)     | 6.0185(8)     | 7.6794(6)     | 117.35(1)  | 427.72(8)       |        |
| 0.5 | $C2/m$            | 10.419(2)     | 6.0040(9)     | 7.7070(7)     | 117.097(9) | 429.18(4)       |        |
| 0.6 | $C2/m$            | 10.409(1)     | 6.0066(6)     | 7.6922(3)     | 117.077(8) | 428.21(3)       |        |
| 0.7 | $C2/m$            | 10.399(1)     | 5.9976(5)     | 7.7107(6)     | 117.101(5) | 428.11(7)       |        |
| 0.8 | $R\bar{3}m$       | 5.9929(2)     |               | 20.6360(8)    |            | 641.84(4)       |        |
| 0.9 | $R\bar{3}m$       | 5.9877(1)     |               | 20.6825(6)    |            | 642.17(2)       |        |

Table S5. Final coordinates, amplitudes of Fourier components for the occupational<sup>1</sup> and displacive<sup>2</sup> modulation functions and isotropic atomic displacement parameters for  $\beta$ -K<sub>5</sub>Yb<sub>0.3</sub>Eu<sub>0.7</sub>(MoO<sub>4</sub>)<sub>4</sub>. Only waves with non-zero amplitudes are shown. The *s* and *c* symbols stand for the sine and cosine components, respectively.

| Atom      | Occupation;<br>parameters of<br>atomic domains                                                                                                         | Wave     | <i>x/a</i>  | <i>y/b</i> | <i>z/c</i>  | $U_{iso}, \text{\AA}^2$ |
|-----------|--------------------------------------------------------------------------------------------------------------------------------------------------------|----------|-------------|------------|-------------|-------------------------|
| <i>M1</i> | 0.5K+0.5(Eu1+Yb1=<br>$\delta_{K1} + \delta_{(Yb1+Eu1)}$ ;<br>$\delta_{K1} = 0.5, x_4^0(K1) = 0,$<br>$\delta_{(Yb1+Eu1)}=0.5,$<br>$x_4^0(Yb1+Eu1)= 0.5$ |          | 0           | 0          | 0           | 0.0304(9)               |
|           |                                                                                                                                                        | <i>s</i> | 0           | 0.030(2)   | 0           |                         |
| K2        | 1 K                                                                                                                                                    |          | 0.8038(4)   | 0          | 0.4159(5)   | 0.0343(9)               |
| Mo        | 1 Mo                                                                                                                                                   |          | 0.3996(2)   | 0          | 0.1972(2)   | 0.0186(8)               |
|           |                                                                                                                                                        | <i>s</i> | 0           | 0.0070(15) | 0           |                         |
|           |                                                                                                                                                        | <i>c</i> | -0.0040(7)  | 0          | 0           |                         |
| O1        | 1 O                                                                                                                                                    |          | 0.3106(12)  | 0          | 0.9556(11)  | 0.023(5)                |
|           |                                                                                                                                                        | <i>s</i> | 0           | -0.075(3)  | 0           |                         |
|           |                                                                                                                                                        | <i>c</i> | -0.054(2)   | 0          | 0           |                         |
| O2        | 1 O                                                                                                                                                    |          | 0.0056(5)   | 0.2606(7)  | 0.2673(6)   | 0.015(3)                |
|           |                                                                                                                                                        | <i>s</i> | -0.0103(17) | -0.027(2)  | -0.0646(17) |                         |
|           |                                                                                                                                                        | <i>c</i> | 0.010(2)    | 0.032(5)   | 0           |                         |
| O3        | 1 O                                                                                                                                                    |          | 0.2671(10)  | 0          | 0.2732(11)  | 0.031(6)                |
|           |                                                                                                                                                        | <i>s</i> | 0           | -0.035(6)  | 0           |                         |
|           |                                                                                                                                                        | <i>c</i> | -0.048(2)   | 0          | -0.074(3)   |                         |

<sup>1</sup>  $\delta_{M1}$  and  $x_4^0(M1)$  parameters define the length and the center coordinate  $x_4$ , respectively, for the atomic domain of *M1*-cation.

<sup>2</sup> The displacive modulation function for the atom  $\lambda$  is defined as  $U^\lambda(x_4) = A_s^\lambda \sin(2\pi x_4) + B_c^\lambda \cos(2\pi x_4)$ ,  $x_4 = \mathbf{qr}^\lambda + t$ .



Table S6. Anisotropic atomic displacement parameters in  $\beta$ -K<sub>5</sub>Yb<sub>0.3</sub>Eu<sub>0.7</sub>(MoO<sub>4</sub>)<sub>4</sub>.

|    | U <sup>11</sup> | U <sup>22</sup> | U <sup>33</sup> | U <sup>12</sup> | U <sup>13</sup> | U <sup>23</sup> |
|----|-----------------|-----------------|-----------------|-----------------|-----------------|-----------------|
| M1 | 0.043(2)        | 0.025(3)        | 0.020(2)        | 0               | 0.0116(17)      | 0               |
| Mo | 0.0168(11)      | 0.0202(12)      | 0.0190(11)      | 0               | 0.0084(9)       | 0               |

Table S7. Main interatomic distances for  $\beta$ -K<sub>5</sub>Yb<sub>0.3</sub>Eu<sub>0.7</sub>(MoO<sub>4</sub>)<sub>4</sub> (Å).

| distances    | average   | min.      | max.      |
|--------------|-----------|-----------|-----------|
| K1-O1×2      | 3.08(2)   | 2.85(2)   | 3.46(2)   |
| K1-O1×4      | 3.232(14) | 3.02(2)   | 3.71(2)   |
| K1-O2×4      | 2.34(2)   | 2.04(2)   | 2.96(2)   |
| K1-O3×2      | 2.297(14) | 2.09(2)   | 2.64(2)   |
| Eu1/Yb1-O1×2 | 3.775(17) | 3.46(2)   | 3.96(2)   |
| Eu1/Yb1-O1×4 | 3.830(15) | 3.38(2)   | 4.03(2)   |
| Eu1/Yb1-O2×4 | 2.820(17) | 2.21(2)   | 3.11(2)   |
| Eu1/Yb1-O3×2 | 2.957(13) | 2.64(2)   | 3.15(2)   |
| K2-O1        | 2.607(9)  | 2.588(11) | 2.643(11) |
| K2-O2×2      | 2.840(15) | 2.62(2)   | 3.07(2)   |
| K2-O2×2      | 3.14(2)   | 2.92(2)   | 3.35(2)   |
| K2-O2×2      | 3.24(2)   | 2.99(3)   | 3.47(3)   |
| K2-O3×2      | 3.18(2)   | 2.92(4)   | 3.42(4)   |
| K2-O3        | 2.846(19) | 2.63(3)   | 3.10(3)   |
| Mo-O1        | 1.737(9)  | 1.719(10) | 1.762(10) |
| Mo-O2×2      | 1.78(2)   | 1.67(3)   | 1.89(3)   |
| Mo-O3        | 1.78(2)   | 1.74(3)   | 1.84(3)   |

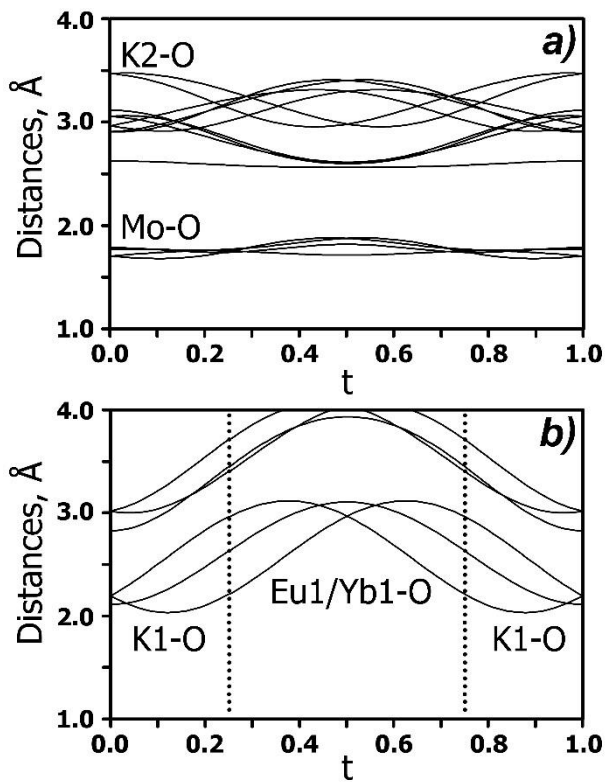

Figure S6.  $t$ -plots of Mo–O and K2–O (a), K1–O (a) and Eu1/Yb1–O (b) bond lengths for the  $\beta$ - $\text{K}_5\text{Yb}_{0.3}\text{Eu}_{0.7}(\text{MoO}_4)_4$  structure.

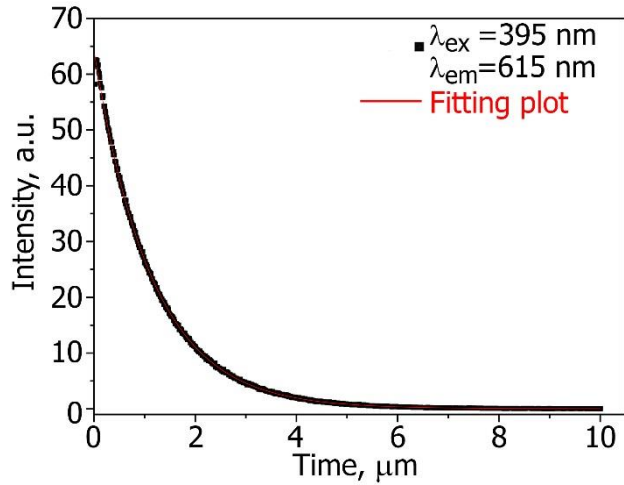

Figure S7. Decay curve of the  $\text{Eu}^{3+}$  emission of  $\alpha$ - $\text{K}_5\text{Yb}_{0.3}\text{Eu}_{0.7}(\text{MoO}_4)_4$  at  $T_{\text{R}}$ .
